# Supplementary material for: 3D bioprinting of a gradient stiffened gelatin–alginate hydrogel with adipose-derived stem cells for full-thickness skin regeneration
Source: Royal Society of Chemistry journal article supplement (doi:10.1039/d2tb02200a), 2023-01-01
Supplement: d2tb02200a1.pdf [file d2tb02200a1.pdf]

# 3D bioprinting of a gradient stiffness gelatin-alginate hydrogel with adipose-derived stem cells for full-thickness skin regeneration

Yuan Ma<sup>1, #</sup>, Yilin Wang<sup>2, #</sup>, Danni Chen<sup>1, #</sup>, Ting Su<sup>1</sup>, Qiang Chang<sup>1, \*</sup>, Wenhua Huang<sup>2, \*</sup>, Feng Lu<sup>1, \*</sup>

Supplementary figures:

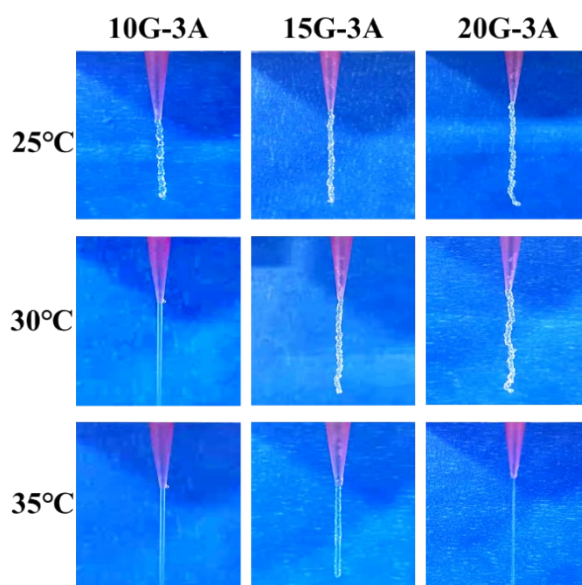

Figure S1. Representative images of bioprinted microfilaments with different concentration of GAH.

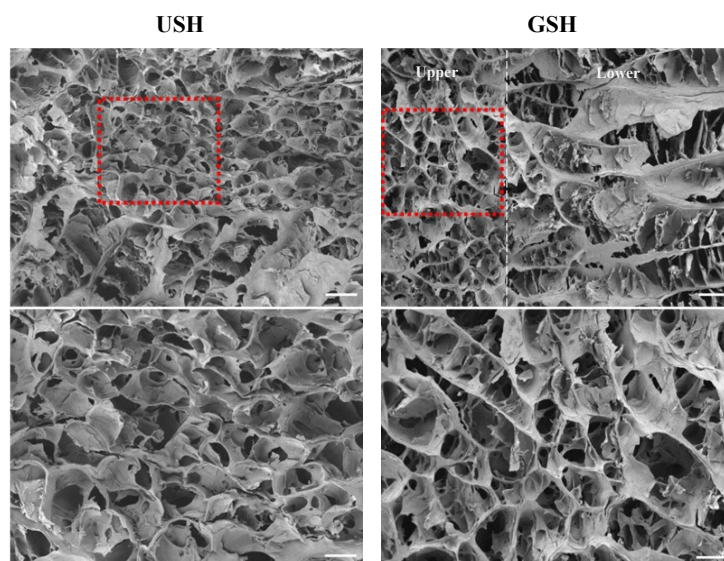

Figure S2. SEM images of 3D-USH and 3D-GSH with cross-sections.

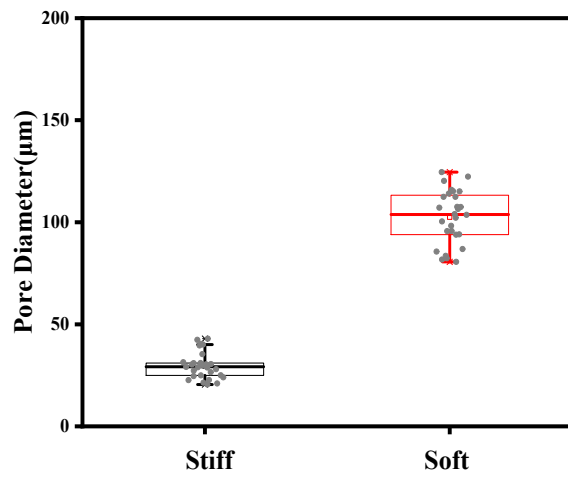

Figure S3. Pore size of 3D-GSH with cross-sections.

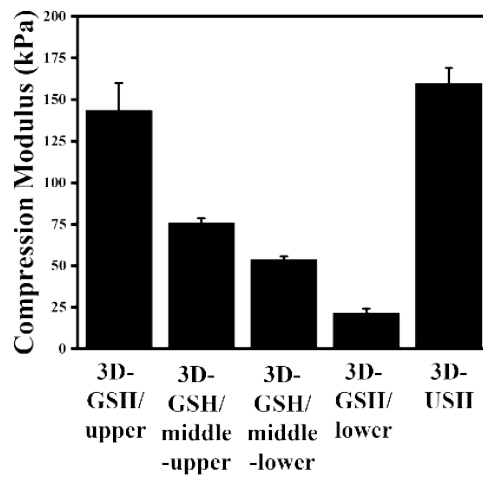

Figure S4. Compression modulus of 3D-GSH and 3D-USH.

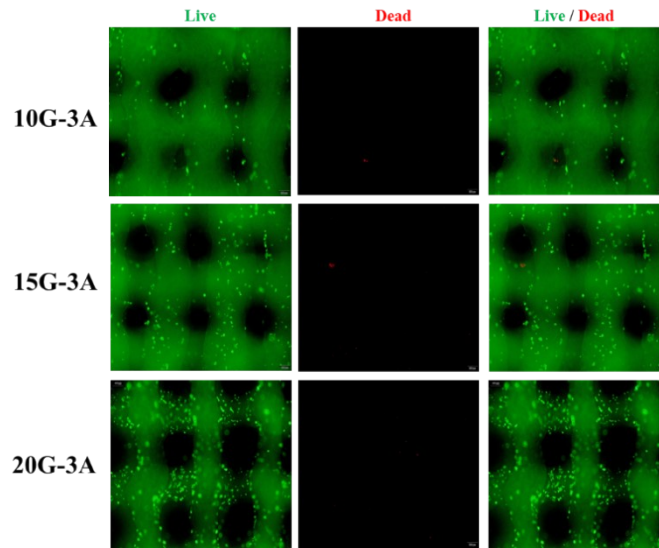

Figure S5. Biocompatibility of monolayer 3D-GAH with different alginate concentrations.

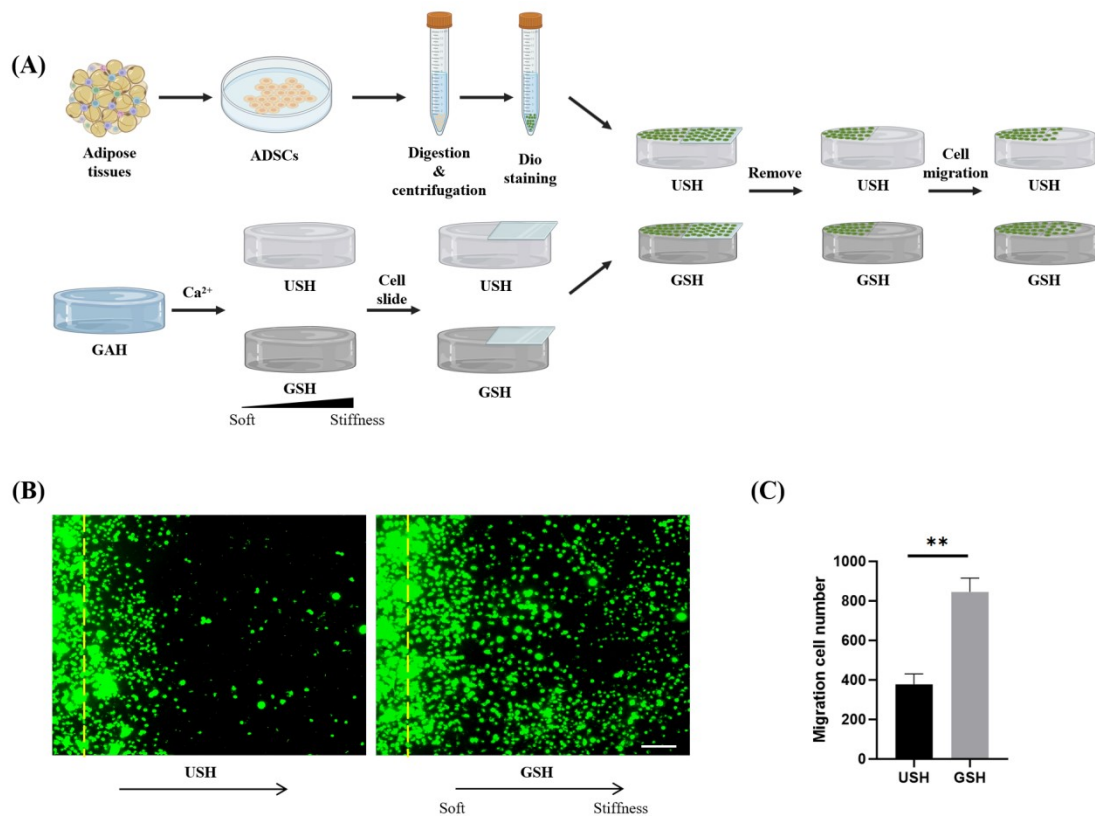

Figure S6. The stiffness gradient of GSH guided the migration of ADSCs from soft to stiffness regions. (A) Schematic diagram; (B) distribution of ADSCs in USH and GSH after 1 day of culture, the dotted line indicates the start site of ADSCs migration, scale bar = 100  $\mu$ m; (C) quantification of the number of migrated cells.
